# Supplementary material for: Animal burrowing at cold seep ecotones boosts productivity by linking macromolecule turnover with chemosynthesis and nutrient cycling
Source: Copernicus journal article supplement (doi:10.5194/egusphere-2024-1285), 2024-05-06
Supplement: Supplementary file 1 [file egusphere-2024-1285-supplement.pdf]

## Supplementary Information

### Animal burrowing at cold seep ecotones boosts productivity by linking macromolecule turnover with chemosynthesis and nutrient cycling

Maxim Rubin-Blum, Eyal Rahav, Guy Sisma-Ventura, Yana Yudkovski, Zoya Harbuzov, Or Bialik, Oded Ezra, Anneleen Foubert, Barak Herut, Yizhaq Makovsky

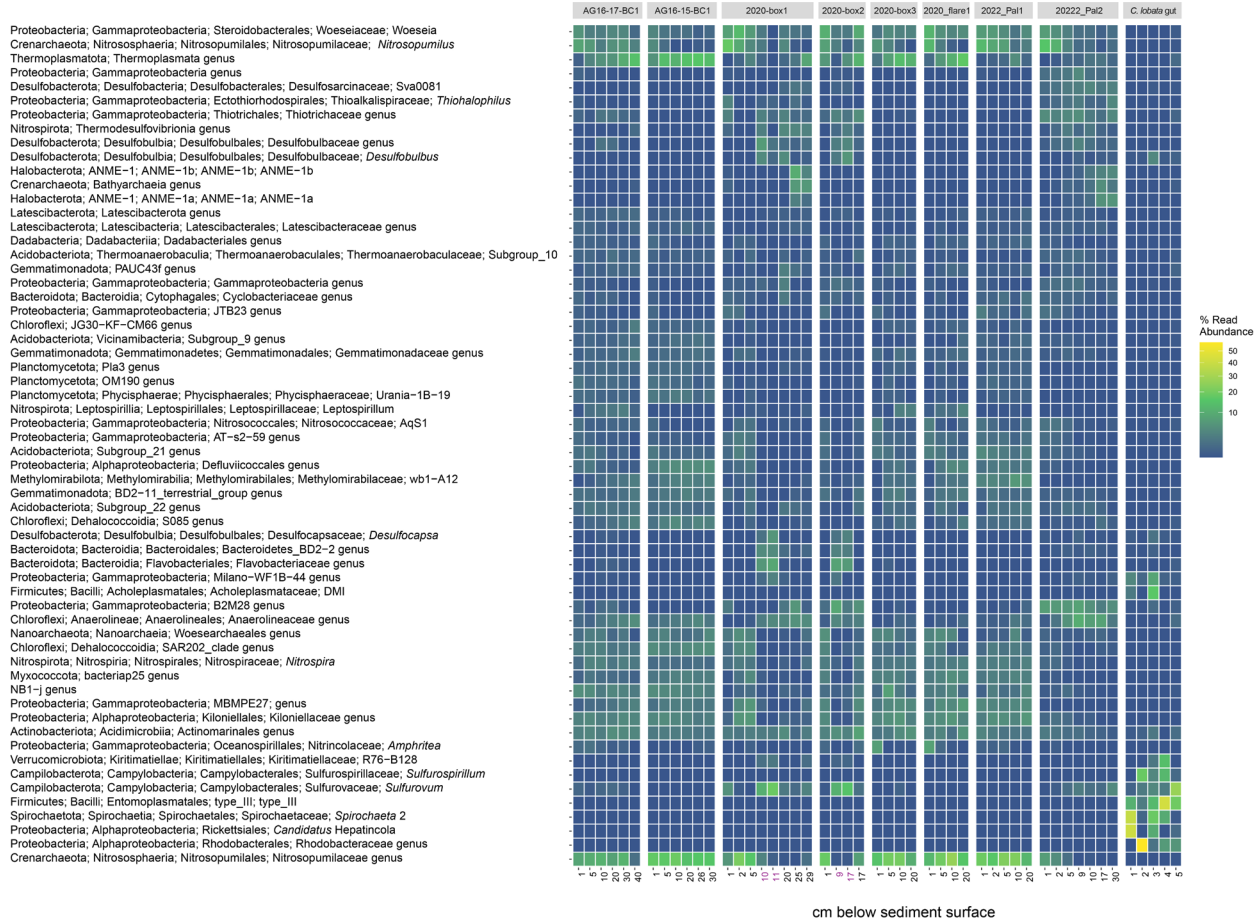

**Figure S1:** Read abundance of the top 50 most prevalent prokaryote taxa at the genus level, in bioturbated sediments from Palmahim Disturbance seep pockmark and the hindgut of the ghost shrimp *Callinectes lobata*.
